# Supplementary material for: Molecular and functional characterization of a conserved odorant receptor from Aedes albopictus
Source: PubMed Central journal article supplement (PMC8805257; doi:10.1186/s13071-022-05158-1), 2022-01-31
Supplement: 13071_2022_5158_MOESM2_ESM.pdf [file 13071_2022_5158_MOESM2_ESM.pdf]

Table S1. Compound used in both electrophysiological recordings and behavioral assays.

| Chemical name             | CAS        | Purity | Source  |
|---------------------------|------------|--------|---------|
| geraniol                  | 106-24-1   | >96.0% | TCI     |
| Linolooloxide             | 60047-17-8 | >97.0% | TCI     |
| (-)-carvone               | 6485-40-1  | 99.00% | TCI     |
| (-)-fenchone              | 7787-20-4  | 98.00% | TCI     |
| (+)-Carvone               | 2244-16-8  | 99.00% | Supelco |
| (+)-fenchone              | 4695-62-9  | 99.50% | Supelco |
| citronellal               | 106-23-0   | >98.0% | TCI     |
| geranyl acetate           | 105-87-3   | ≥97%   | Sigma   |
| limonene                  | 138-86-3   | 98.00% | TCI     |
| citral                    | 5392-40-5  | >95.0% | Sigma   |
| myrcene                   | 123-35-3   | 98.00% | TCI     |
| 1,8-cineole               | 470-82-6   | >96%   | TCI     |
| alpha-Terpinene           | 99-86-5    | >95.0% | Sigma   |
| p-Cymene                  | 99-87-6    | 99.00% | Sigma   |
| Camphor                   | 76-22-2    | >90%   | TCI     |
| a-pinene                  | 80-56-8    | 98.00% | Sigma   |
| 2,3-butanedione           | 431-03-8   | >98.0% | TCI     |
| 2-butanone                | 78-93-3    | ≥99.0% | Sigma   |
| 2-heptanone               | 110-43-0   | 99.00% | TCI     |
| 2-Nonanone                | 821-55-6   | ≥99%   | Sigma   |
| 3-Octanone                | 106-68-3   | ≥99%   | TCI     |
| 6-Methyl-5-hepten-2-one   | 110-93-0   | 98.50% | TCI     |
| acetone                   | 67-64-1    | ≥99.5% | Sigma   |
| Cyclohexanone             | 108-94-1   | >98.0% | TCI     |
| 1-butanol                 | 71-36-3    | >96.0% | TCI     |
| 1-Dodecanol               | 112-53-8   | >99.0% | TCI     |
| 1-hepten-3-ol             | 4938-52-7  | >98.0% | TCI     |
| 1-hexanol                 | 111-27-3   | >98.0% | TCI     |
| 1-Hexen-3-ol              | 4798-44-1  | >98.0% | TCI     |
| 1-octen-3-ol              | 3391-86-4  | ≥98%   | Sigma   |
| 1-pentanol                | 71-41-0    | >95.0% | TCI     |
| 2-ethyl-1-hexanol         | 104-76-7   | 98.50% | TCI     |
| 3-Methyl-1-butanol        | 123-51-3   | >99.5% | TCI     |
| 3-Methyl-2-cyclohexen-1ol | 21378-21-2 | 96.00% | Sigma   |
| 4-Methylcyclohexanol      | 589-91-3   | ≥99.0% | Sigma   |
| cis-3-hexen-1-ol          | 928-96-1   | ≥98%   | Sigma   |
| ethanol                   | 64-17-5    | ≥99.0% | aladdin |
| methanol                  | 67-56-1    | >99.8% | TCI     |
| Z2-hexenol                | 928-94-9   | 95.00% | Sigma   |
| 1-Octanol                 | 111-87-5   | >95.0% | TCI     |
| Cyclohexanol              | 108-93-0   | >99.0% | TCI     |
| citronellol               | 7540-51-4  | >90.0% | TCI     |
| 1-octyn-3-ol              | 818-72-4   | 98.00% | Sigma   |

|                         |            |        |         |
|-------------------------|------------|--------|---------|
| linalool                | 78-70-6    | >96.0% | TCI     |
| 1-Chlorododecane        | 112-52-7   | 97.00% | TCI     |
| 2,4,5-Trimethylthiazole | 13623-11-5 | >99.8% | TCI     |
| 2-Acetylpyridine        | 1122-62-9  | 98.00% | TCI     |
| 2-Acetylthiazole        | 24295-03-2 | ≥99%   | Sigma   |
| 2-acetylthiophene       | 88-15-3    | 95.00% | Sigma   |
| 2-Ethoxythiazole        | 15679-19-3 | >99%   | TCI     |
| 2-Isobutylthiazole      | 18640-74-9 | 97.00% | TCI     |
| 4,5-dimethyl thiazole   | 3581-91-7  | ≥99%   | Sigma   |
| 4-methylthiazole        | 693-95-8   | >93%   | TCI     |
| Thiazole                | 288-47-1   | 99.00% | Sigma   |
| 2,4-Dimethylthiazole    | 541-58-2   | >99%   | TCI     |
| 2-Ethylphenol           | 90-00-6    | >98.0% | TCI     |
| 2-Methylphenol          | 95-48-7    | >99.0% | TCI     |
| 2-Ethyltoluene          | 611-14-3   | ≥98%   | Sigma   |
| 2-Phenoxy ethanol       | 122-99-6   | 98.00% | TCI     |
| 2-propylphenol          | 644-35-9   | 97.00% | TCI     |
| 3-Methylphenol          | 108-39-4   | >98.0% | TCI     |
| 3-methylindole          | 83-34-1    | >98.0% | TCI     |
| 4-ethylphenol           | 123-07-9   | >97.0% | TCI     |
| 4-Methylphenol          | 106-44-5   | >99.0% | TCI     |
| Acetophenone            | 98-86-2    | >98.5% | TCI     |
| benzaldehyde            | 100-52-7   | >98.0% | TCI     |
| benzyl acetate          | 140-11-4   | 97.00% | TCI     |
| indole                  | 120-72-9   | >99.0% | TCI     |
| Methyl benzoate         | 93-58-3    | >99.0% | TCI     |
| methyl salicylate       | 119-36-8   | >99.0% | TCI     |
| Phenethyl acetate       | 103-45-7   | >99.0% | TCI     |
| phenol                  | 108-95-2   | >99.5% | TCI     |
| 4-Propyl benzaldehyde   | 28785-06-0 | 95.00% | Sigma   |
| pentanoic acid          | 109-52-4   | >98.0% | TCI     |
| Heptanoic acid          | 111-14-8   | >98.0% | TCI     |
| Nonanoic acid           | 112-05-0   | 98.50% | TCI     |
| octanoic acid           | 124-07-2   | ≥98%   | Sigma   |
| Dodecanoic acid         | 143-07-7   | 98.50% | TCI     |
| 7-octenoic acid         | 18719-24-9 | >99.0% | TCI     |
| Decanoic acid           | 334-48-5   | ≥99%   | Sigma   |
| octadecanoic acid       | 57-11-4    | >98.0% | TCI     |
| Tridecanoic acid        | 638-53-9   | >99.0% | TCI     |
| isobutyric acid         | 79-31-2    | >99.0% | TCI     |
| hexanoic acid           | 142-62-1   | ≥99%   | Sigma   |
| propanoic acid          | 79-09-4    | >99.0% | TCI     |
| oleic acid              | 112-80-1   | 98.00% | TCI     |
| Undecanoic acid         | 112-37-8   | >98.0% | TCI     |
| cadaverine              | 462-94-2   | 99.00% | Supelco |
| putrescine              | 110-60-1   | 97.00% | TCI     |

|                                         |            |            |          |
|-----------------------------------------|------------|------------|----------|
| amyl acetate                            | 628-63-7   | >99.0%     | TCI      |
| ethyl acetate                           | 141-78-6   | >98.0%     | TCI      |
| ethyl butyrate                          | 105-54-4   | 98.50%     | TCI      |
| Ethyl propanoate                        | 105-37-3   | 98.00%     | TCI      |
| Isoamyl acetate                         | 123-92-2   | 98.50%     | TCI      |
| isobutyl acetate                        | 110-19-0   | 97.00%     | TCI      |
| Methyl caprylate                        | 111-11-5   | 98.50%     | TCI      |
| methyl propanoate                       | 554-12-1   | >95.0%     | TCI      |
| propyl acetate                          | 109-60-4   | 98.50%     | TCI      |
| Ethyl caproate                          | 123-66-0   | 98.00%     | TCI      |
| trans-11-Octadecenoic Acid Methyl Ester | 6198-58-9  | >98.0%     | TCI      |
| cis-11-Octadecenoic Acid Methyl Ester   | 1937-63-9  | 98.50%     | TCI      |
| hexadecanoic acid methyl ester          | 112-39-0   | 99.50%     | TCI      |
| Ethyl oleate                            | 111-62-6   | >98.0%     | TCI      |
| ethyl acrylate                          | 140-88-5   | 99.00%     | TCI      |
| cis-9-Hexadecenoic Acid Methyl Ester    | 1120-25-8  | 97.00%     | TCI      |
| Methyl butyrate                         | 623-42-7   | >99.5%     | TCI      |
| Decanal                                 | 112-31-2   | 98.00%     | TCI      |
| E2-hexenal                              | 6728-26-3  | 98.00%     | Sigma    |
| Hexanal                                 | 66-25-1    | >90%       | TCI      |
| Nonanal                                 | 124-19-6   | 99.00%     | TCI      |
| Octanal                                 | 124-13-0   | 98.00%     | TCI      |
| $\Delta$ -Decanolactone                 | 705-86-2   | >96%       | TCI      |
| gamma-decalactone                       | 706-14-9   | >98%       | TCI      |
| 5-alpha-androst-16-one                  | 18339-16-7 | 98.00%     | TCI      |
| Eugenol                                 | 97-53-0    | >99.0%     | TCI      |
| thymol                                  | 89-83-8    | >99.0%     | TCI      |
| EBF                                     | 18794-84-8 | 98.50%     | Sigma    |
| Pyrethrin I                             | 121-21-1   | $\geq$ 99% | Purified |
| Pyrethrin II                            | 121-29-9   | $\geq$ 99% | Purified |
| Cinerin I                               | 97-12-1    | $\geq$ 99% | Purified |
| Cinerin II                              | 204-454-2  | $\geq$ 99% | Purified |
| Jasmolin I                              | 4466-14-2  | $\geq$ 99% | Purified |
| Jasmolin II                             | 1172-63-0  | $\geq$ 99% | Purified |
| 4-ketoisophorone                        | 1125-21-9  | >98.0%     | TCI      |
| 4'-Ethylacetophenone                    | 937-30-4   | 97.00%     | Sigma    |
| DEET                                    | 134-62-3   | 99%        | Sigma    |
